# Supplementary material
Source: publisher site journal article supplement (https://www.dovepress.com/article/324520)
Supplement: Supplementary file 1 [file get_supplementary_file.php]

# Medical Students' Feedback of Applying the Virtual Dissection Table (Anatomage) in

## Learning Anatomy

### Appendix

| Students | A      | B      | C      | D      | E      | F      |
|----------|--------|--------|--------|--------|--------|--------|
| 1        | Yes    | Yes    | Yes    | Yes    | Yes    | Yes    |
| 2        | Yes    | Yes    | Yes    | Yes    | Yes    | Yes    |
| 3        | Yes    | Yes    | Yes    | Yes    | Yes    | Yes    |
| 4        | Yes    | Yes    | Yes    | Unsure | Yes    | Yes    |
| 5        | Yes    | Yes    | Yes    | Yes    | Yes    | Yes    |
| 6        | Yes    | Yes    | Yes    | Yes    | Yes    | Yes    |
| 7        | Yes    | Yes    | Yes    | Yes    | Yes    | Yes    |
| 8        | Unsure | Unsure | Unsure | Unsure | Unsure | Unsure |
| 9        | Unsure | Unsure | Unsure | Unsure | Unsure | Unsure |
| 10       | No     | Unsure | No     | Yes    | Yes    | Unsure |
| 11       | Yes    | Yes    | Yes    | Yes    | Yes    | Yes    |
| 12       | Yes    | Yes    | Yes    | Yes    | Yes    | Yes    |
| 13       | Unsure | Yes    | Yes    | Yes    | Yes    | Unsure |
| 14       | Yes    | Yes    | Yes    | Yes    | Yes    | Yes    |
| 15       | Yes    | Yes    | Yes    | Yes    | Yes    | Yes    |
| 16       | Yes    | Yes    | Yes    | Yes    | Yes    | Yes    |
| 17       | Yes    | Unsure | Unsure | Yes    | Yes    | Unsure |
| 18       | Yes    | Yes    | No     | No     | No     | No     |
| 19       | Yes    | Yes    | Yes    | Yes    | Yes    | Yes    |
| 20       | Yes    | Unsure | Yes    | Yes    | Yes    | Yes    |
| 21       | Yes    | Yes    | Yes    | Yes    | Yes    | Yes    |
| 22       | Yes    | Unsure | Unsure | Yes    | Yes    | Yes    |
| 23       | Yes    | Yes    | Yes    | Yes    | Yes    | Yes    |
| 24       | Yes    | Yes    | Yes    | Yes    | Yes    | Yes    |
| 25       | Yes    | No     | No     | Yes    | Yes    | Yes    |
| 26       | Yes    | Yes    | Yes    | Yes    | Yes    | Yes    |
| 27       | No     | No     | No     | No     | No     | No     |
| 28       | Yes    | Yes    | Yes    | Yes    | Yes    | Yes    |
| 29       | Yes    | Yes    | Unsure | Yes    | Yes    | Yes    |
| 30       | Yes    | Yes    | Yes    | Yes    | Yes    | Yes    |
| 31       | Yes    | Yes    | Yes    | Yes    | Yes    | Yes    |
| 32       | Unsure | Unsure | Unsure | Yes    | Yes    | Unsure |
| 33       | Yes    | Yes    | Yes    | Yes    | Yes    | Yes    |
| 34       | Yes    | Yes    | Yes    | Yes    | Yes    | Yes    |
| 35       | Yes    | Yes    | Yes    | Yes    | Yes    | Unsure |
| 36       | Yes    | Yes    | Yes    | Yes    | Yes    | Yes    |
| 37       | Yes    | Yes    | Yes    | Yes    | Yes    | Yes    |
| 38       | Yes    | Yes    | Yes    | Yes    | Yes    | Unsure |
| 39       | No     | No     | No     | No     | No     | No     |
| 40       | Yes    | Yes    | Yes    | Yes    | Yes    | Yes    |
| 41       | Yes    | Yes    | Yes    | Yes    | Yes    | Yes    |
| 42       | Yes    | Unsure | Yes    | Yes    | Yes    | Yes    |
| 43       | Yes    | Yes    | Yes    | Yes    | Yes    | Yes    |
| 44       | No     | Unsure | Unsure | Unsure | Unsure | Unsure |

# Medical Students' Feedback of Applying the Virtual Dissection Table (Anatamage) in

## Learning Anatomy

### Appendix

|    |        |        |        |        |        |        |
|----|--------|--------|--------|--------|--------|--------|
| 45 | Yes    | Yes    | Unsure | Yes    | Yes    | Unsure |
| 46 | Yes    | Yes    | Yes    | Yes    | Yes    | Yes    |
| 47 | Unsure | Yes    | Yes    | Yes    | Yes    | Yes    |
| 48 | Yes    | Yes    | Yes    | Yes    | Yes    | Unsure |
| 49 | Yes    | Yes    | Yes    | Yes    | Yes    | Yes    |
| 50 | Yes    | Yes    | Yes    | Yes    | Yes    | Yes    |
| 51 | Yes    | Yes    | Yes    | Yes    | Yes    | Yes    |
| 52 | Yes    | Yes    | Yes    | Yes    | Yes    | Yes    |
| 53 | Yes    | Yes    | Yes    | Yes    | Yes    | Yes    |
| 54 | Yes    | Yes    | Yes    | Yes    | Yes    | Yes    |
| 55 | Yes    | Yes    | Yes    | Yes    | Yes    | Yes    |
| 56 | Yes    | Yes    | Yes    | Yes    | Yes    | Yes    |
| 57 | Yes    | Yes    | Yes    | Yes    | Yes    | Yes    |
| 58 | Yes    | No     | Unsure | Unsure | Yes    | Yes    |
| 59 | Yes    | Yes    | Yes    | Yes    | Yes    | Yes    |
| 60 | Yes    | Yes    | Yes    | Yes    | Yes    | Yes    |
| 61 | Yes    | Yes    | Yes    | No     | Yes    | Unsure |
| 62 | Yes    | Yes    | Yes    | Yes    | Yes    | Yes    |
| 63 | Yes    | Yes    | Yes    | Yes    | Yes    | Yes    |
| 64 | No     | No     | No     | Yes    | Unsure | Unsure |
| 65 | No     | Unsure | Unsure | Yes    | Yes    | Unsure |
| 66 | Yes    | Yes    | Yes    | Yes    | Yes    | Yes    |
| 67 | Yes    | Yes    | Unsure | Yes    | Yes    | Unsure |
| 68 | Yes    | Yes    | Yes    | Yes    | Yes    | Yes    |
| 69 | Yes    | Yes    | Yes    | Yes    | Yes    | Yes    |
| 70 | Yes    | Unsure | Yes    | Yes    | Yes    | Yes    |
| 71 | Unsure | Unsure | Yes    | Yes    | Yes    | Unsure |
| 72 | Unsure | Unsure | Unsure | Yes    | Yes    | Unsure |
| 73 | Yes    | No     | Unsure | Yes    | Yes    | Unsure |
| 74 | Unsure | No     | Unsure | Yes    | Yes    | Yes    |
| 75 | Yes    | Yes    | Yes    | Unsure | Yes    | Yes    |
| 76 | Yes    | Yes    | Yes    | Yes    | Yes    | Yes    |
| 77 | No     | No     | No     | Unsure | Unsure | Unsure |
| 78 | Yes    | Yes    | Yes    | Yes    | Yes    | Yes    |

## **Medical Students' Feedback of Applying the Virtual Dissection Table (Anatomage) in**

### **Learning Anatomy**

#### **Appendix**

- A.** Do you find that using 3D Anatomage as an additional tool to cadaveric dissected specimens is useful for learning anatomy?
- B.** Did you benefit from applying 3D Anatomage in learning anatomy?
- C.** Do you find that using 3D Anatomage during anatomy practical sessions enhances active learning?
- D.** Do you think that the ability to make sections of the body (sagittal, parasagittal, coronal and transverse) in 3D Anatomage enhances your understanding of the locations and relationships of different internal body structures?
- E.** Do you think that the ability to rotate the body and dissect in 3D Anatomage helps in visualizing the body system?
- F.** Do you think that incorporation of imaging in 3D Anatomage enables your understanding of anatomy as it is envisioned through medical imaging?
